# Supplementary material
Source: publisher figshare collection journal article supplement (https://tandf.figshare.com/ndownloader/files/31150778)
Supplement: Supplementary file 1 [file 31150778]

|  | | | | | | | | | |
| --- | --- | --- | --- | --- | --- | --- | --- | --- | --- |
| Time (hrs) | ***MEB-1** | **MEB-2** | **MEB-3** | | | **%Decolorization (Mean)** | **S.D**** | | **S.E***** |
| 24 | 20.88 | 18.93 | 16.01 | | 18.61 | | 2.45 | 1.415 | |
| 48 | 33.76 | 31.92 | 29.54 | 31.74 | | | 2.12 | 1.224 | |
| 72 | 50.97 | 53.68 | 56.06 | | 53.57 | | 2.55 | 1.472 | |
| 96 | 94.37 | 97.62 | 98.38 | | 96.79 | | 2.13 | 1.230 | |

Table S2:

* MEB: Malt Extract Broth; **S.D: Standard Deviation; ***S.E: Standard Error
